# Supplementary material for: Solvothermal preparation and visible photocatalytic activity of polycrystalline β-In2S3nanotubes
Source: Royal Society of Chemistry journal article supplement (doi:10.1039/c0ce00084a), 2010-09-06

## Electronic Supplementary Information (ESI)

**Table S1.** Absorption peak and identified functional groups of  $\beta$ - $\text{In}_2\text{S}_3$ .

| Wavenumbers ( $\text{cm}^{-1}$ ) | Identified                                                       |
|----------------------------------|------------------------------------------------------------------|
| 3426, 1624                       | O-H vibration                                                    |
| 2956, 2922, 2851                 | C-H of $\text{CH}_3, \text{CH}_2$ stretching vibration           |
| 1576, 1524, 1410                 | C=C, C=N stretching vibration                                    |
| 1315, 1271, 1160                 | C-H of $\text{CH}_3, \text{CH}_2$ in-plane bending vibration     |
| 1016, 928                        | C-H of $\text{CH}_3, \text{CH}_2$ out-plane bending vibration    |
| 701, 619                         | C-H in-plane swing vibration and out-plane bending vibration     |
| 451                              | In-S stretching vibration coupled slightly with C- $\text{CH}_3$ |

**Fig. S1.** TEM images of products at different times (a) 0 h, and (b) 0.5 h.

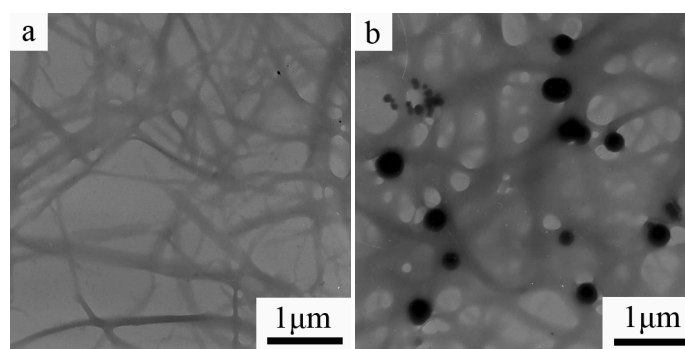

**Table S2.** EA data of the products at different times.

|                  | C     | H     | N     | S     | O     | In    |
|------------------|-------|-------|-------|-------|-------|-------|
| <b>0 h (EA%)</b> | 58.90 | 10.39 | 0.051 | 13.03 | 1.72  | 15.91 |
| (mol ratio)      | 35.42 | 74.97 | 0.026 | 2.94  | 0.78  | 1     |
| <b>1 h (EA%)</b> | 8.248 | 1.845 | 3.960 | 11.69 | 23.84 | 50.42 |
| (mol ratio)      | 1.565 | 4.200 | 0.644 | 0.832 | 3.39  | 1     |
| <b>3 h (EA%)</b> | 8.993 | 1.513 | 1.471 | 24.86 | 3.30  | 59.86 |
| (mol ratio)      | 1.402 | 2.84  | 0.20  | 1.49  | 0.40  | 1     |
| <b>12h (EA%)</b> | 5.569 | 1.009 | 0.786 | 26.68 | 2.486 | 64.22 |
| (mol ratio)      | 0.83  | 1.80  | 0.10  | 1.49  | 0.28  | 1     |
| <b>24h (EA%)</b> | 3.196 | 1.023 | 0.841 | 27.56 | 1.13  | 66.25 |
| (mol ratio)      | 0.46  | 1.78  | 0.10  | 1.49  | 0.12  | 1     |

**Fig. S2.** TG curves of the samples prepared by solvothermal treatments for (a) 0 h, (b) 1 h, (c) 3 h, (d) 12 h, and (e) 24 h.

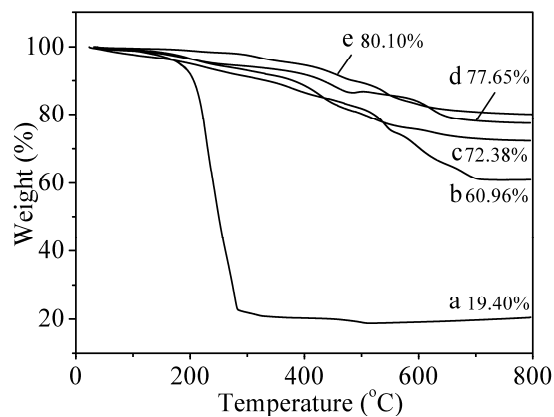

**Fig. S3.** SEM images of the product prepared by solvothermal treatment for 1.5 h.

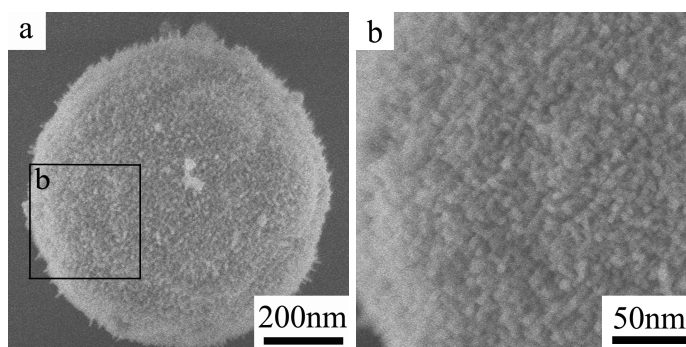

**Fig. S4.** TEM image and XRD pattern of the product obtained with molar ratio thiol to  $\text{In}(\text{NO}_3)_3$  of 3:2.

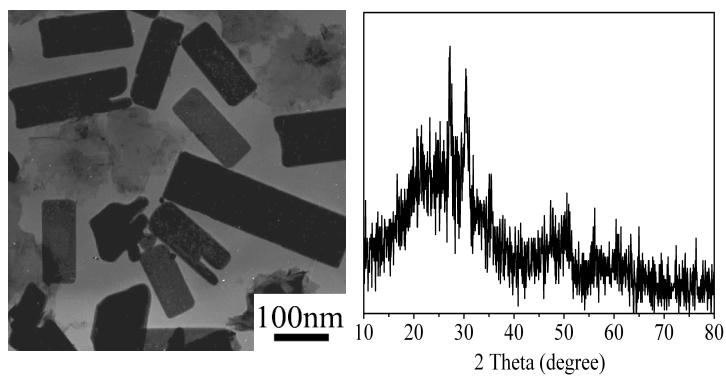

**Fig. S5.** TEM images of  $\text{In}_2\text{S}_3$  obtained from different sulfur sources (a)  $\text{Na}_2\text{S}$ , and (b) thiourea; XRD patterns (c) and IR spectra (d) of  $\text{In}_2\text{S}_3$  obtained from thiourea.

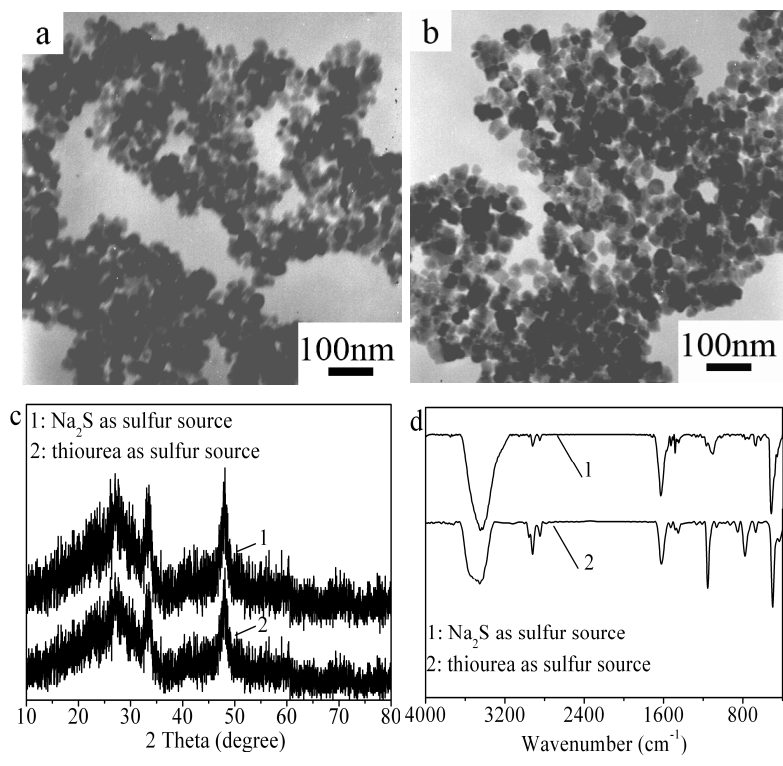

**Fig. S6.** Particle size distribution diagrams of  $\text{In}_2\text{S}_3$  obtained from different sulfur sources (a)  $\text{Na}_2\text{S}$ , (b) thiourea.

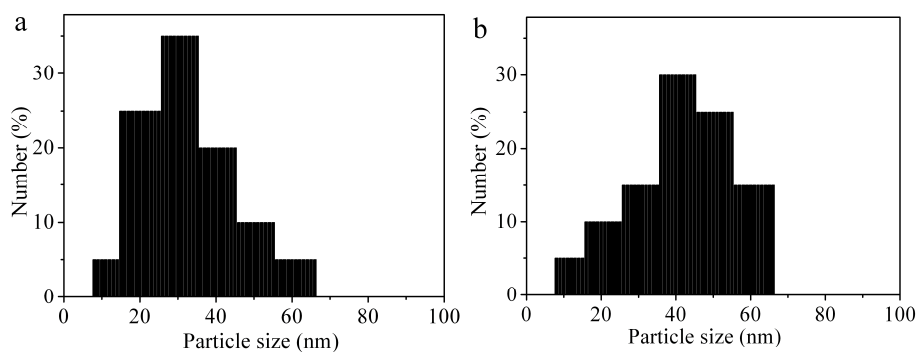

**Fig. S7a.** Absorption spectrum of the RhB solution in the presence of  $\text{In}_2\text{S}_3$  nanotubes under exposure to sunlight (a) 0 min, (b) 30 min, (c) 60 min, (d) 90 min, (d) 120 min, (e) 180 min, and (f) 210 min; **Fig. S7b.** The photocatalytic efficiency as a function of recycling times.

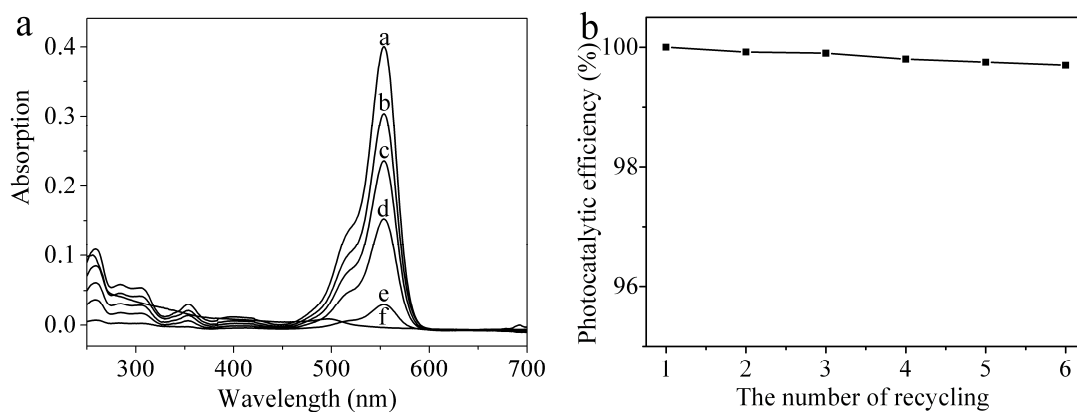

**Fig. S8.** UV-vis absorption spectrum (a)  $\text{In}_2\text{S}_3$  nanoparticles, and (b) P25.

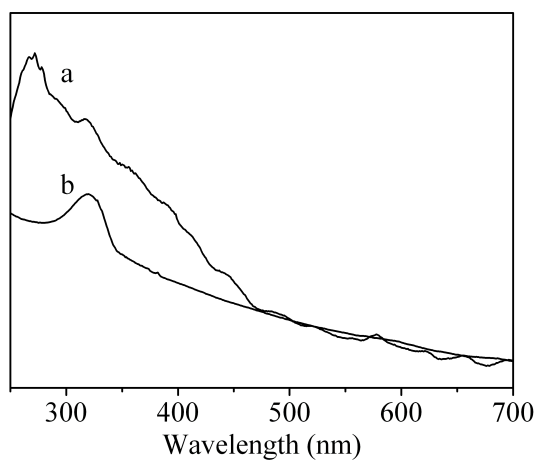

Supplement: c0ce00084a.pdf [file c0ce00084a.pdf]
